# Supplementary material
Source: PubMed Central journal article supplement (PMC2753413)
Supplement: NIHMS99302-supplement-1_si_001.pdf [file NIHMS99302-supplement-1_si_001.pdf]

## *Supporting Information*

### **Structure Elucidation at the Nanomole-Scale. 1. Trisoxazole macrolides and Thiazole-containing cyclic peptides from the Nudibranch *Hexabranchnus sanguineus*.**

*Doralyn S. Dalisay*<sup>†</sup>, *Evan W. Rogers*<sup>†</sup>, *Arthur S. Edison*<sup>‡</sup>, *Tadeusz F. Molinski*<sup>\*,†,§</sup>

<sup>†</sup>Department of Chemistry and Biochemistry <sup>§</sup>Skaggs School of Pharmacy and  
Pharmaceutical Sciences, MC0358, 9500 Gilman Drive, La Jolla, California 92093-0358,  
and <sup>‡</sup>National High Magnetic Field Laboratory and Department of Biochemistry &  
Molecular Biology, University of Florida, Gainesville, Florida 32610

|                                                                              |     |
|------------------------------------------------------------------------------|-----|
| <sup>1</sup> H NMR spectrum of 9-des-O-methyl kaabiramide, <b>3</b>          | S2  |
| COSY spectrum of <b>3</b>                                                    | S3  |
| HSQC spectrum of <b>3</b>                                                    | S4  |
| HMBC spectrum of <b>3</b>                                                    | S5  |
| <sup>1</sup> H NMR spectrum of 33-methyl tetrahydrohalichondramide, <b>5</b> | S6  |
| COSY spectrum of <b>5</b>                                                    | S7  |
| TOCSY spectrum of <b>5</b>                                                   | S8  |
| HSQC spectrum of <b>5</b>                                                    | S9  |
| HMBC spectrum of <b>5</b>                                                    | S10 |
| <sup>1</sup> H NMR spectrum of sanguinamide A, <b>7</b>                      | S11 |
| COSY spectrum of <b>7</b>                                                    | S12 |
| TOCSY spectrum of <b>7</b>                                                   | S13 |
| HSQC spectrum of <b>7</b>                                                    | S14 |
| HMBC spectrum of <b>7</b>                                                    | S15 |
| <sup>1</sup> H NMR spectrum of sanguinamide B, <b>8</b>                      | S16 |
| COSY spectrum of <b>8</b>                                                    | S17 |
| TOCSY spectrum of <b>8</b>                                                   | S18 |
| HSQC spectrum of <b>8</b>                                                    | S19 |
| HMBC spectrum of <b>8</b>                                                    | S20 |
| CD spectra of <b>7</b> and <b>8</b>                                          | S21 |

<sup>1</sup>H NMR spectrum of **3** (CD<sub>3</sub>CN, 600 MHz)

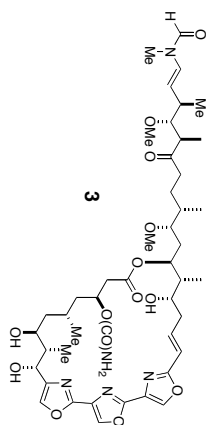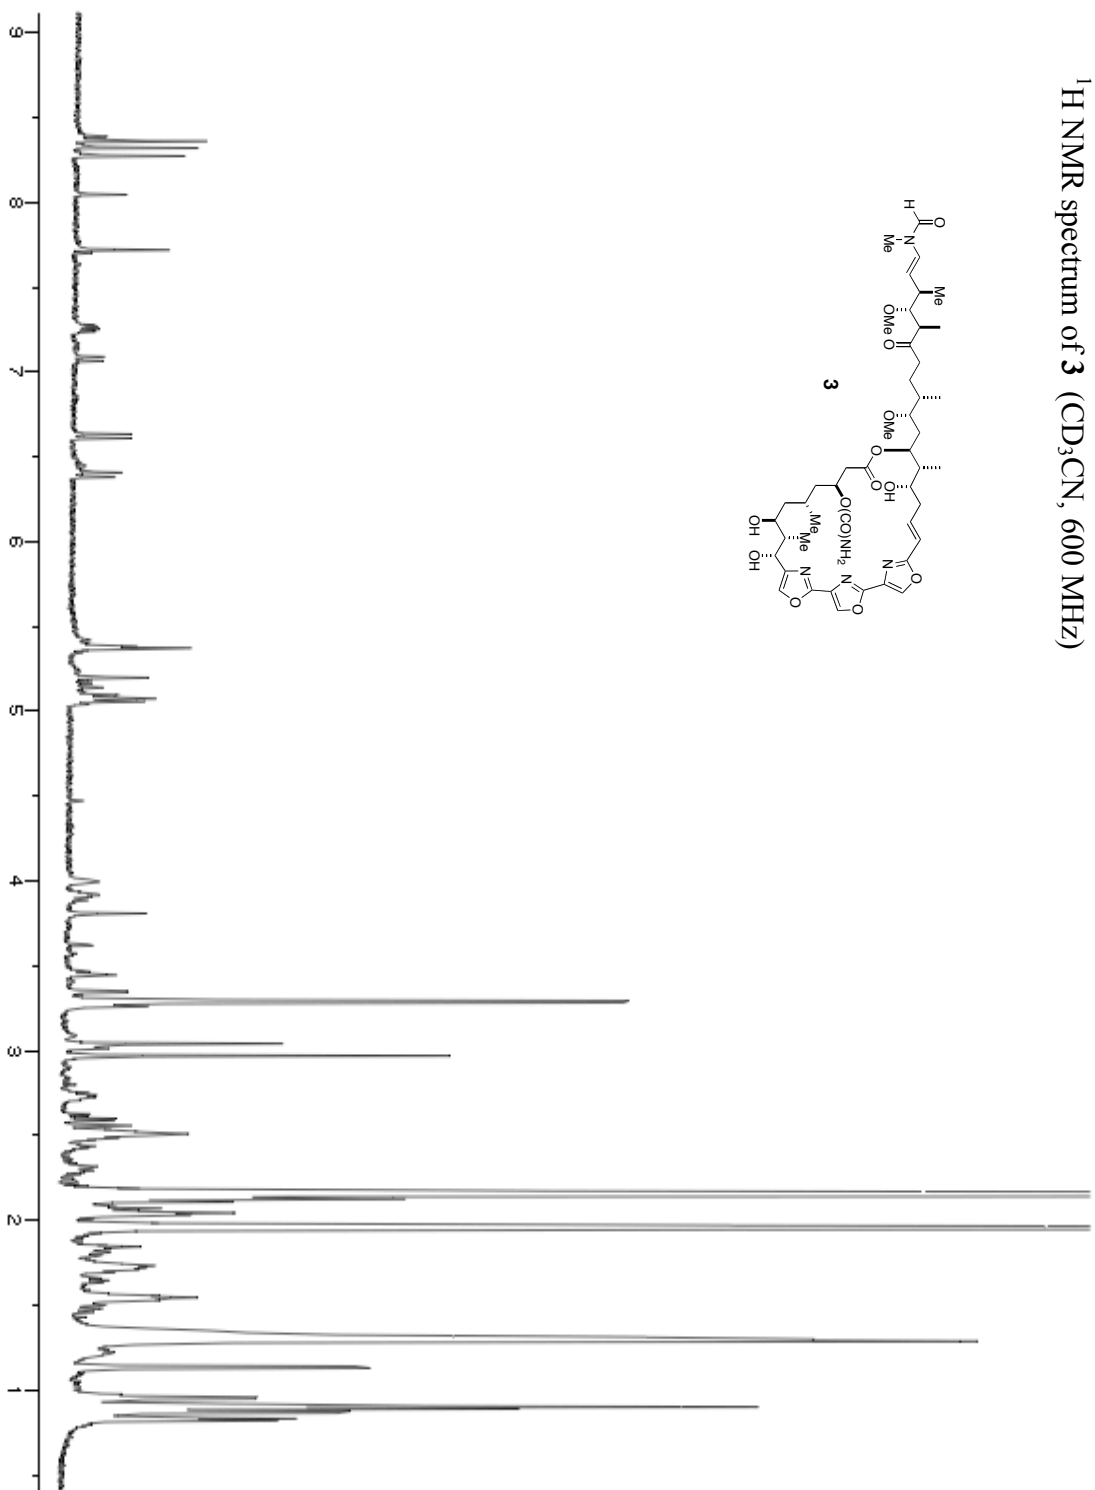

COSY NMR spectrum of **3** (CD<sub>3</sub>CN, 600 MHz)

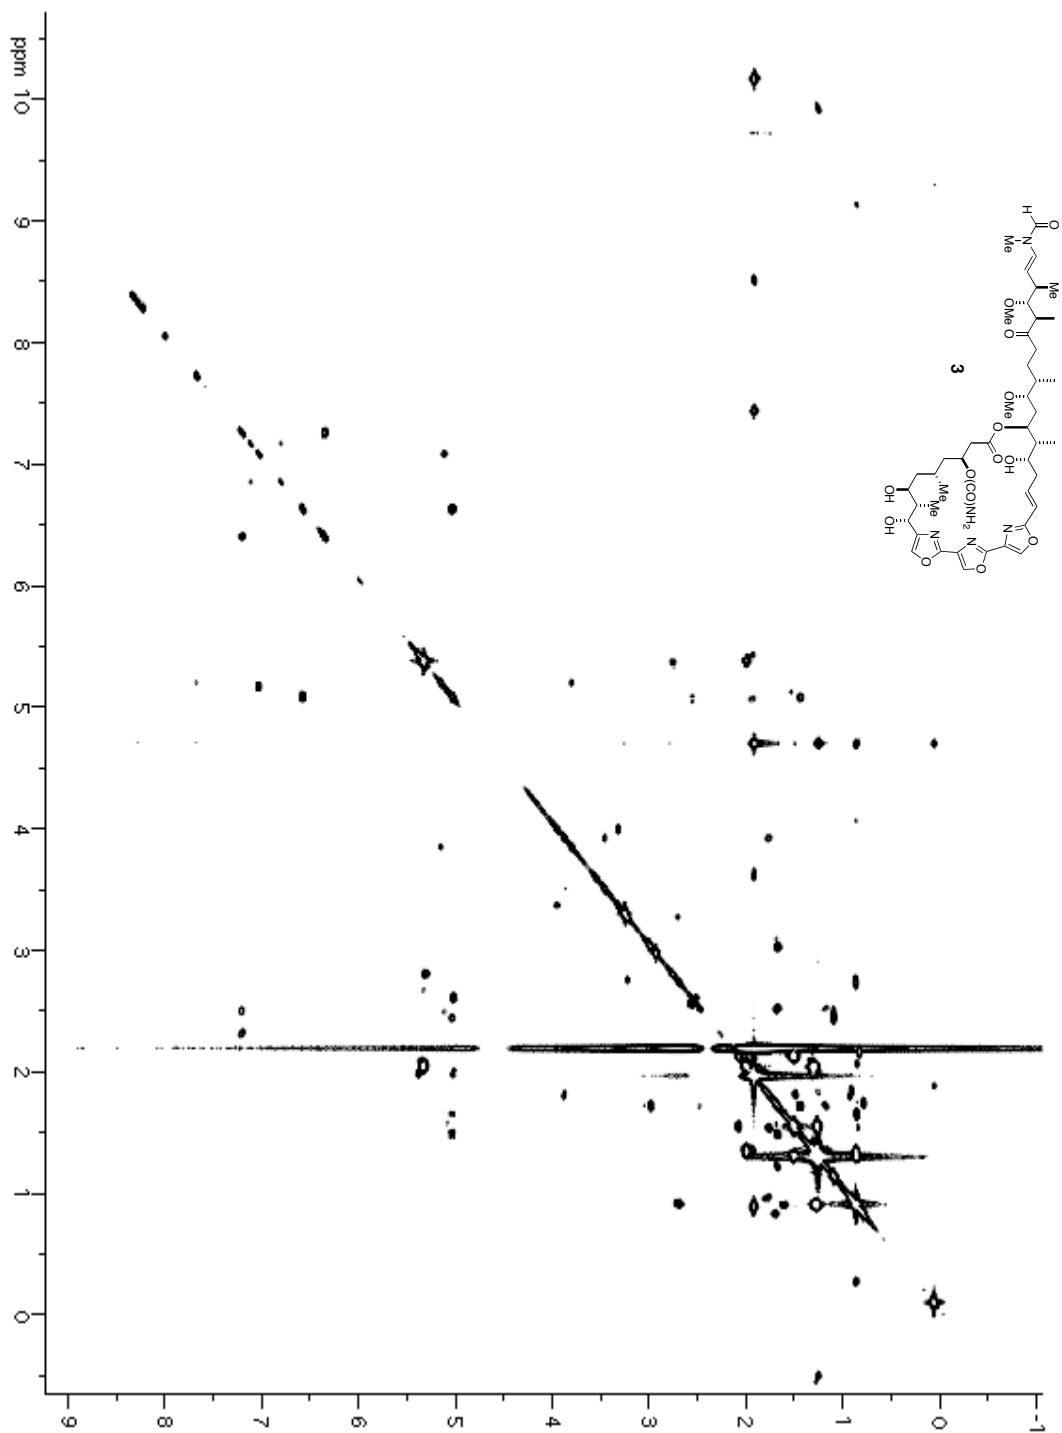

HSQC NMR spectrum of **3** (CD<sub>3</sub>CN, 600 MHz)

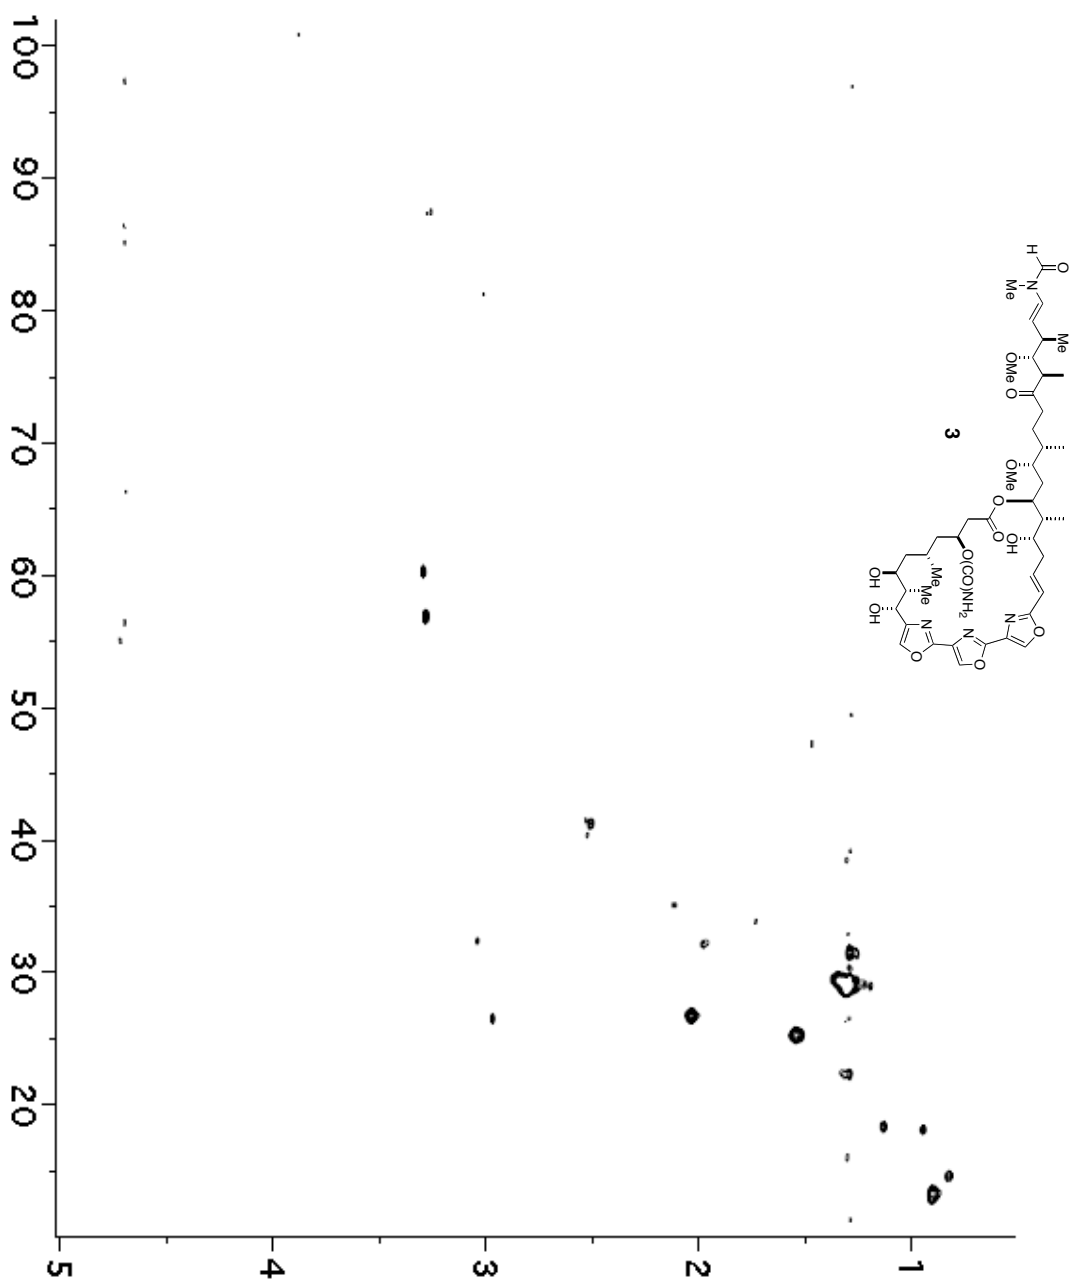



<sup>1</sup>H NMR spectrum of **5** (CDCl<sub>3</sub>, 400 MHz)

```

90.001.5BF10F6F3F3F2.A
exp1 std1h
SAMPLE Dec: & VT
date Dec 3 2006 dffrq 400.125
solvent CDCl3 dnmr 30
F1 ACQUISITION exp dof 0
sfrfq 400.125 dm nmn
dn 1.41 dnm
dd 23936 dm wtfilc 200
sw 6006.0 not used proc fi
fb not used fn not used
bs 5.4
dwmr 7.0 weff
dl 1.000 wexp
d1 0 wbs
nt 94 wnt
f 2
atlock n
gain not used
flags n
11 n
11 n
11 n
dp y
DISPLAY
sp -977.2
wp 6005.48
vc 2.48
sc 0
wc 250
hzmm 50.44
fs 0.44
f1 977.5
f2 0
th 20
ins cdc ph
100.000

```

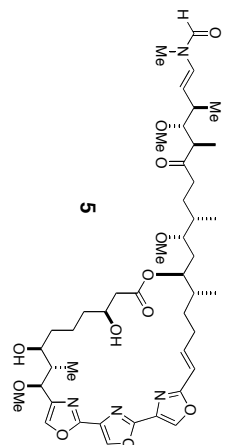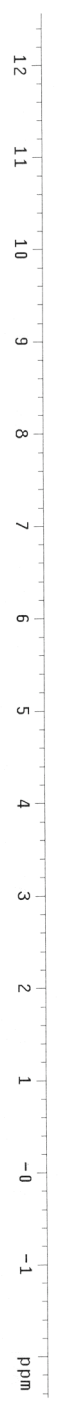

COSY NMR spectrum of **5** (CDCl<sub>3</sub>, 600 MHz)

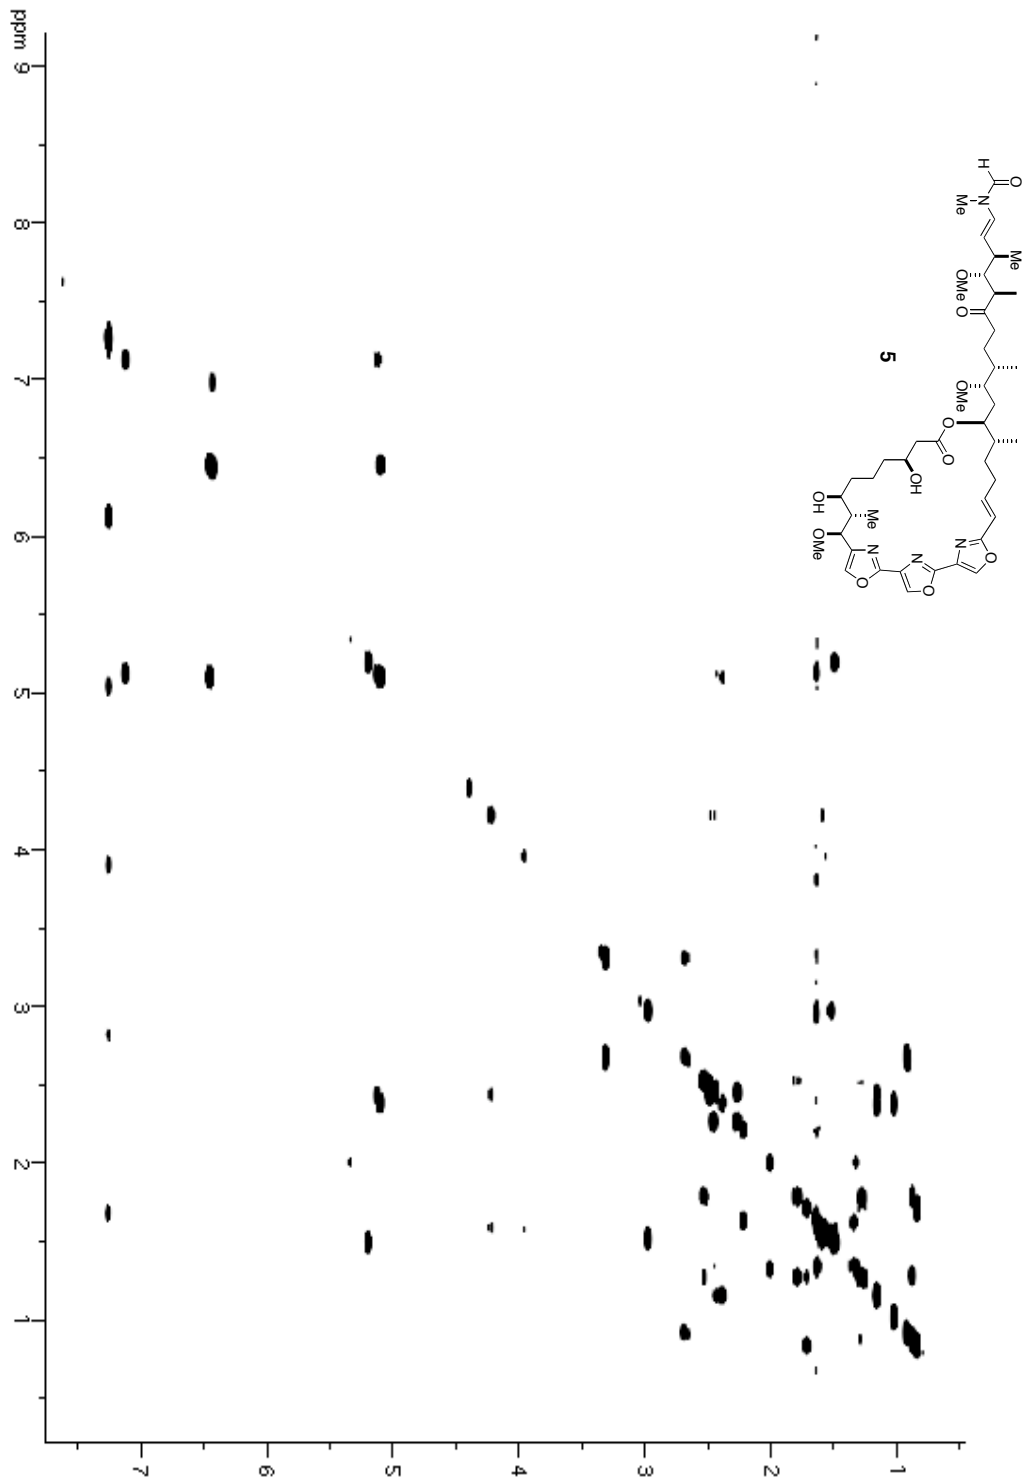

TOCSY NMR spectrum of **5** (CDCl<sub>3</sub>, 600 MHz)

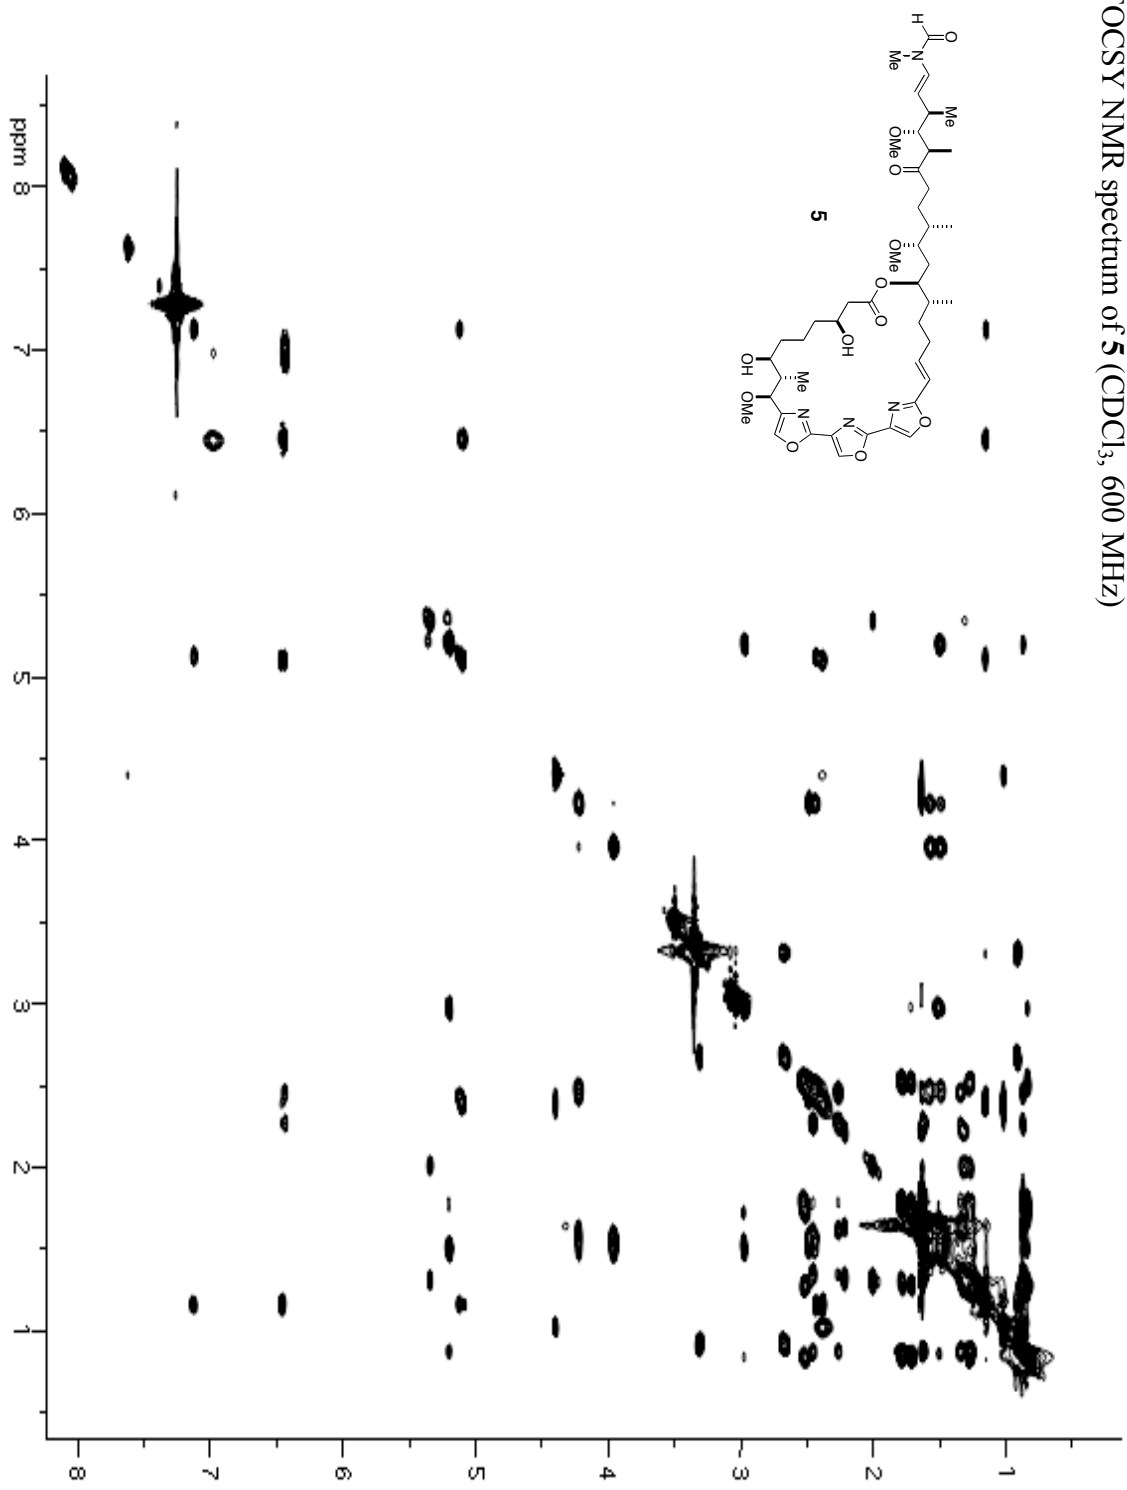





HMBC NMR spectrum of **5** (CDCl<sub>3</sub>, 600 MHz)

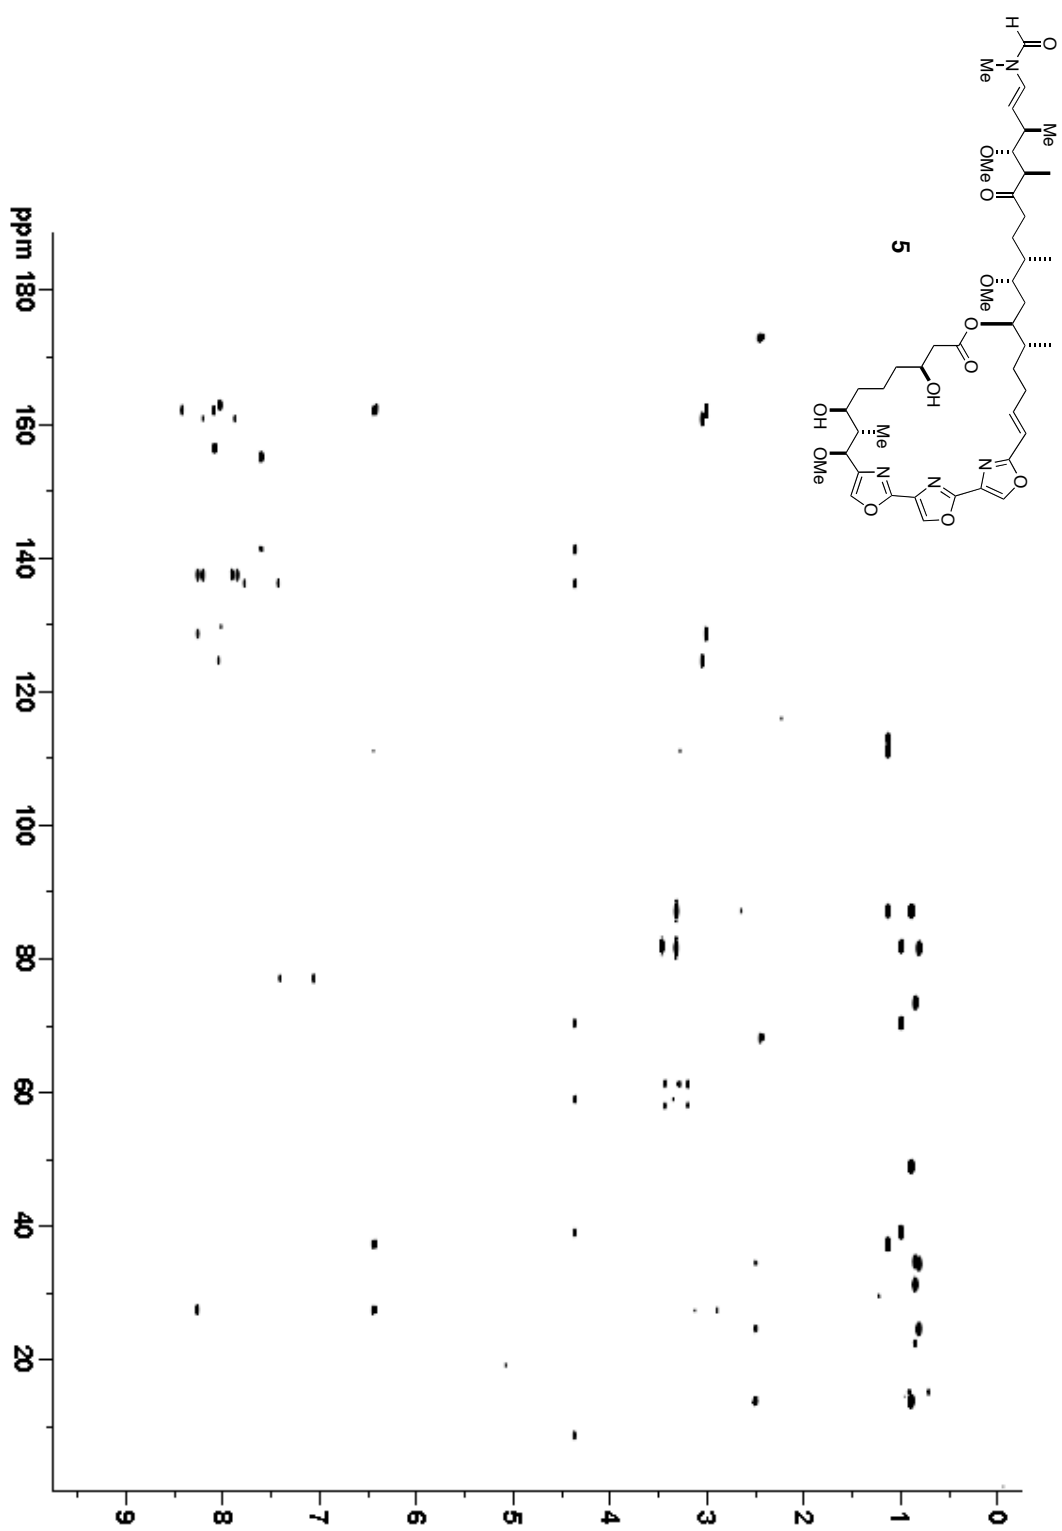

<sup>1</sup>H NMR spectrum of 7 (CDCl<sub>3</sub>, 600 MHz)

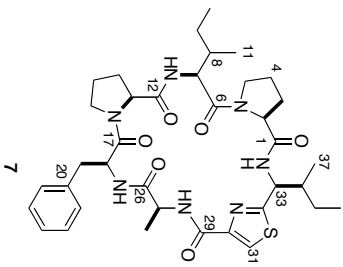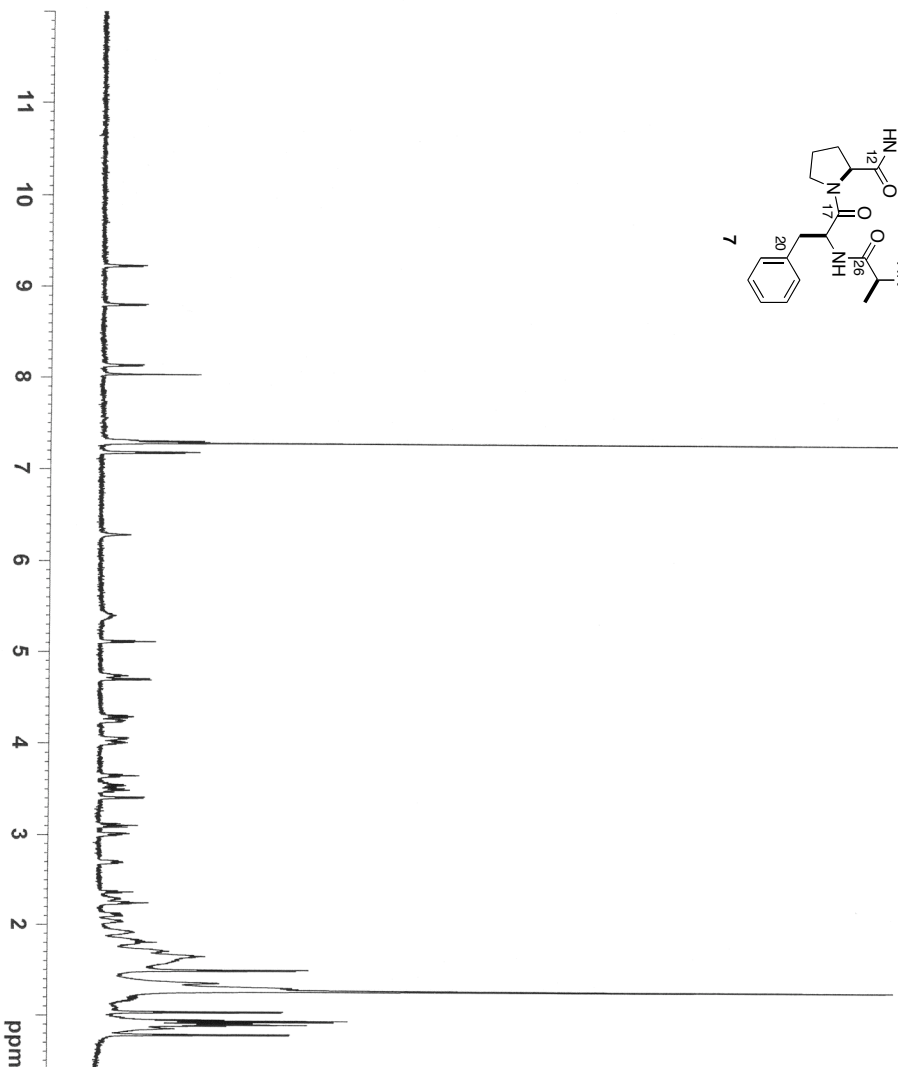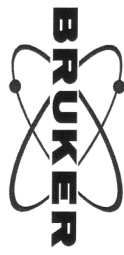

Current Data Parameters  
 NAME 5BFCF4-Bruker\_Switzerland  
 EXPNO 1  
 F2 - Acquisition Parameters  
 Date\_ 20070502  
 Time 6.36  
 INSTRUM spect  
 F2PROB zgpg30  
 PULPROG zgpg30  
 TD 65536  
 SOLVENT CDCl3  
 NS 1  
 DS 0  
 SWH 12335.526 Hz  
 AQ 0.189228 Hz  
 RG 2.6204429  
 DE 40.533 usec  
 TE 298.0 K  
 T1 1.00000000 sec  
 T10 1  
 CHANNEL f1  
 =====  
 NUC1 1H  
 P1 8.55 usec  
 PL1 17.10 dB  
 SFO1 600.1337060 MHz  
 F2 - Processing parameters  
 SI 32768  
 SF 600.1300000 MHz  
 WDW EM  
 SSB 0  
 GB 0  
 PC 1.00

COSY NMR spectrum of 7 (CDCl<sub>3</sub>, 600 MHz)

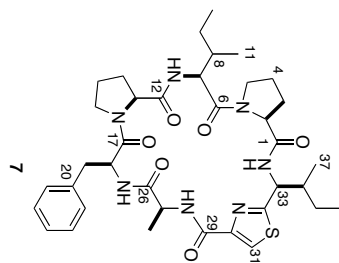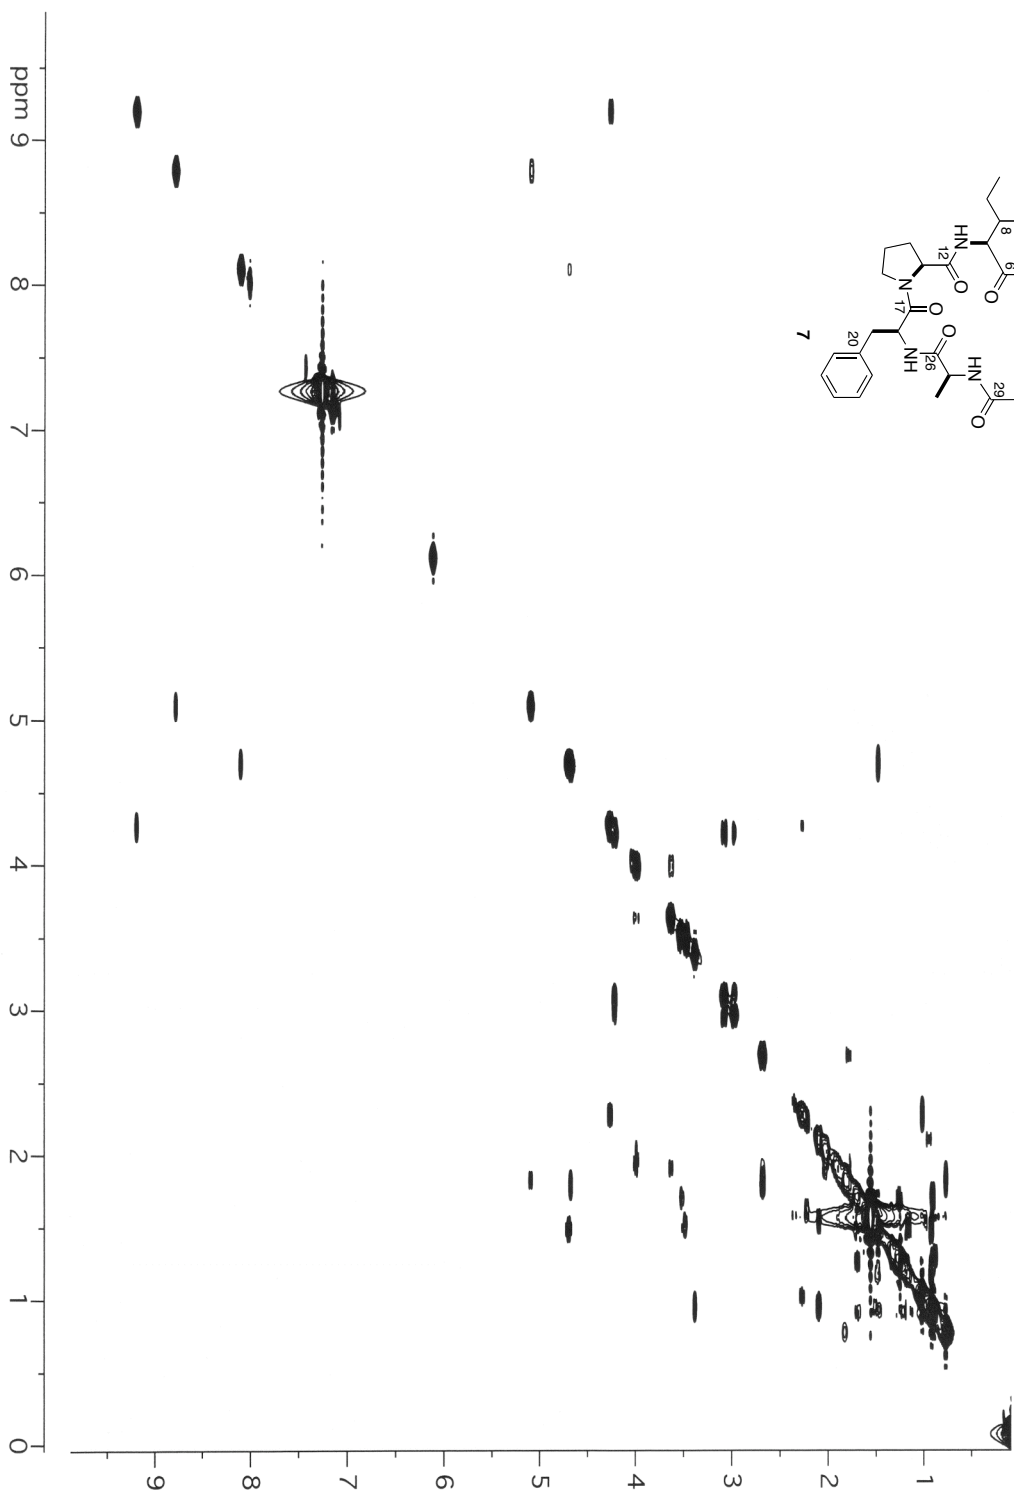

TOCSY NMR spectrum of **7** (CDCl<sub>3</sub>, 600 MHz)

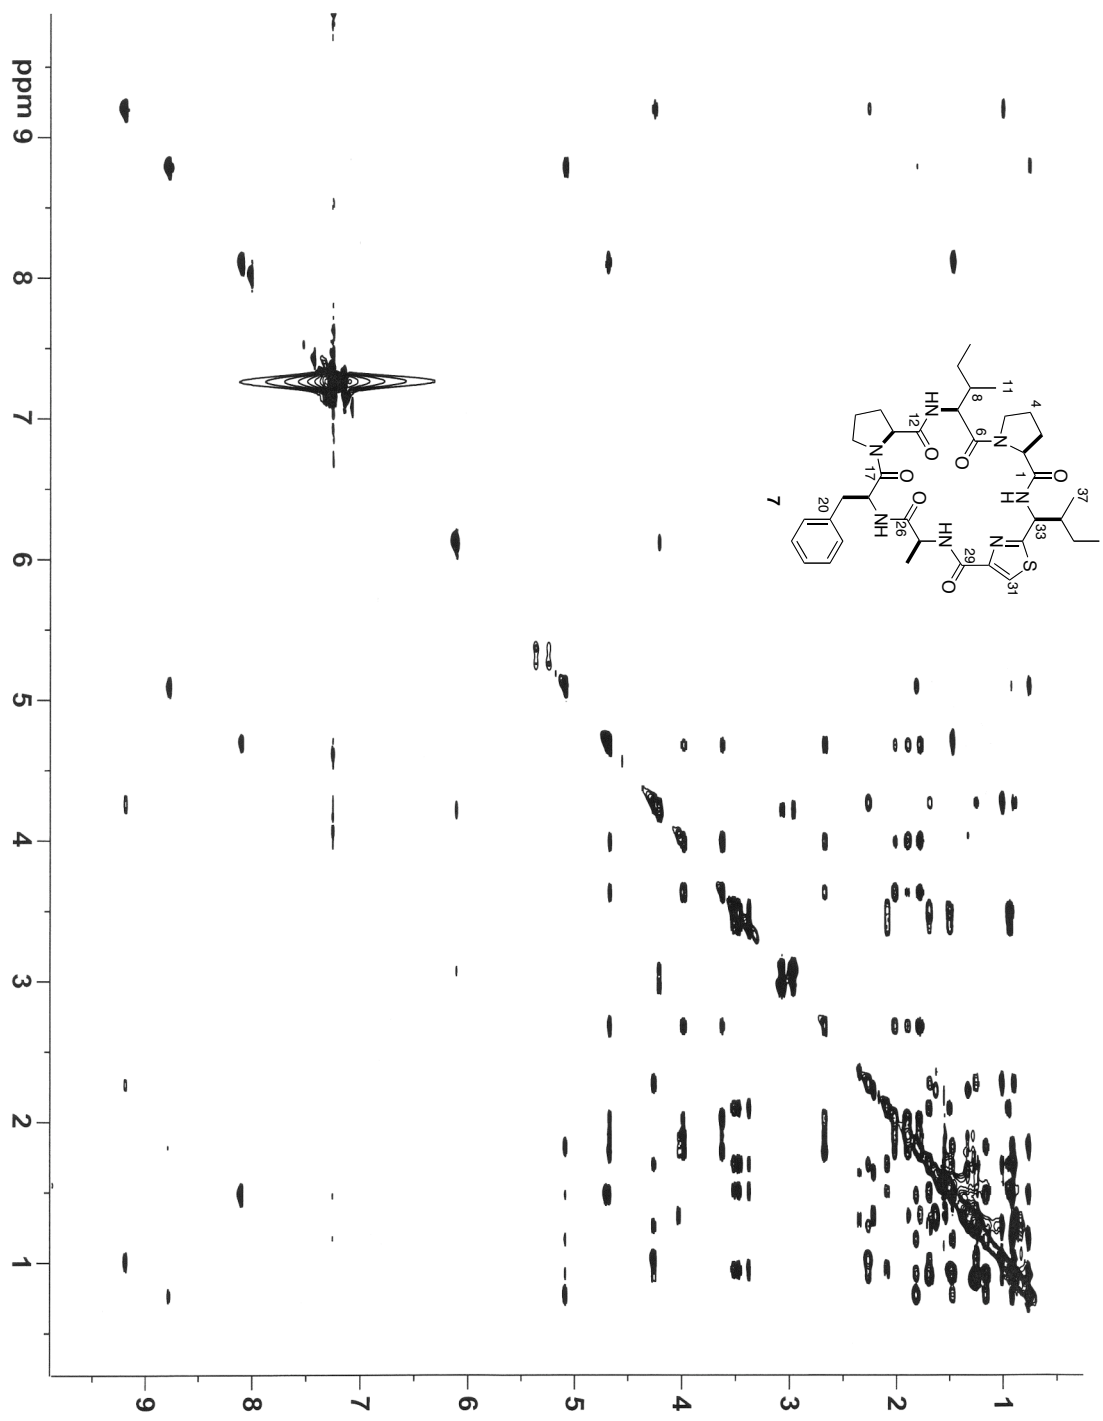



HMBC NMR spectrum of 7 (CDCl<sub>3</sub>, 600 MHz)

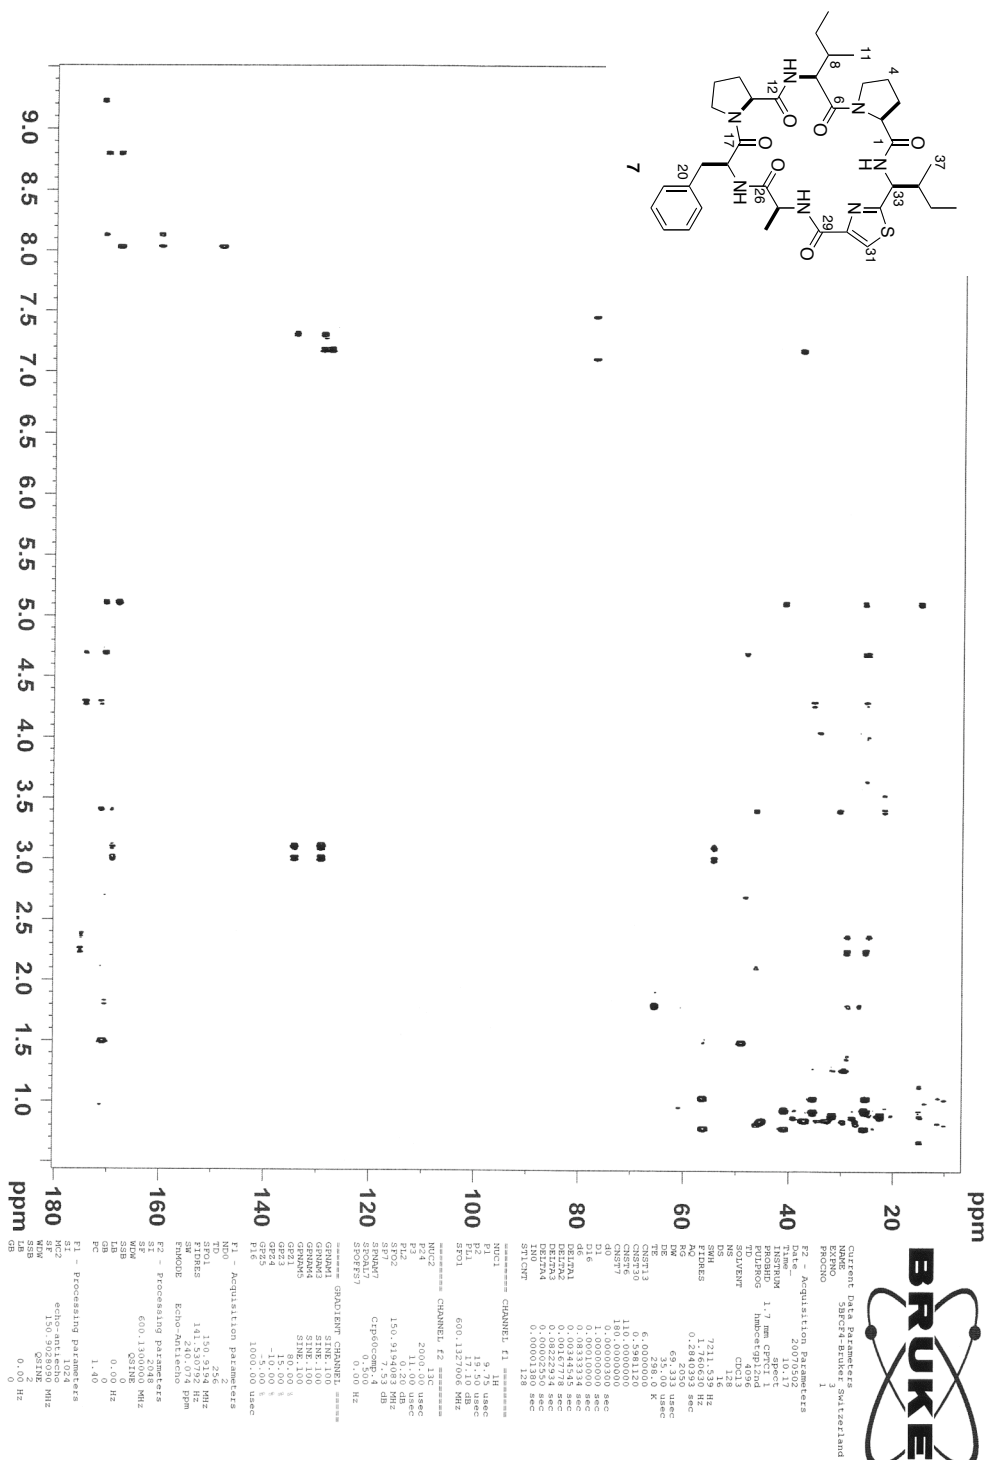

<sup>1</sup>H NMR spectrum of **8** (CDCl<sub>3</sub>, 600 MHz)

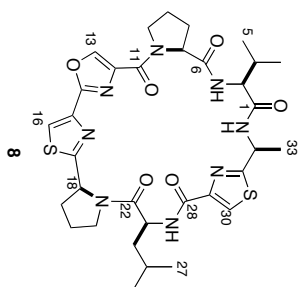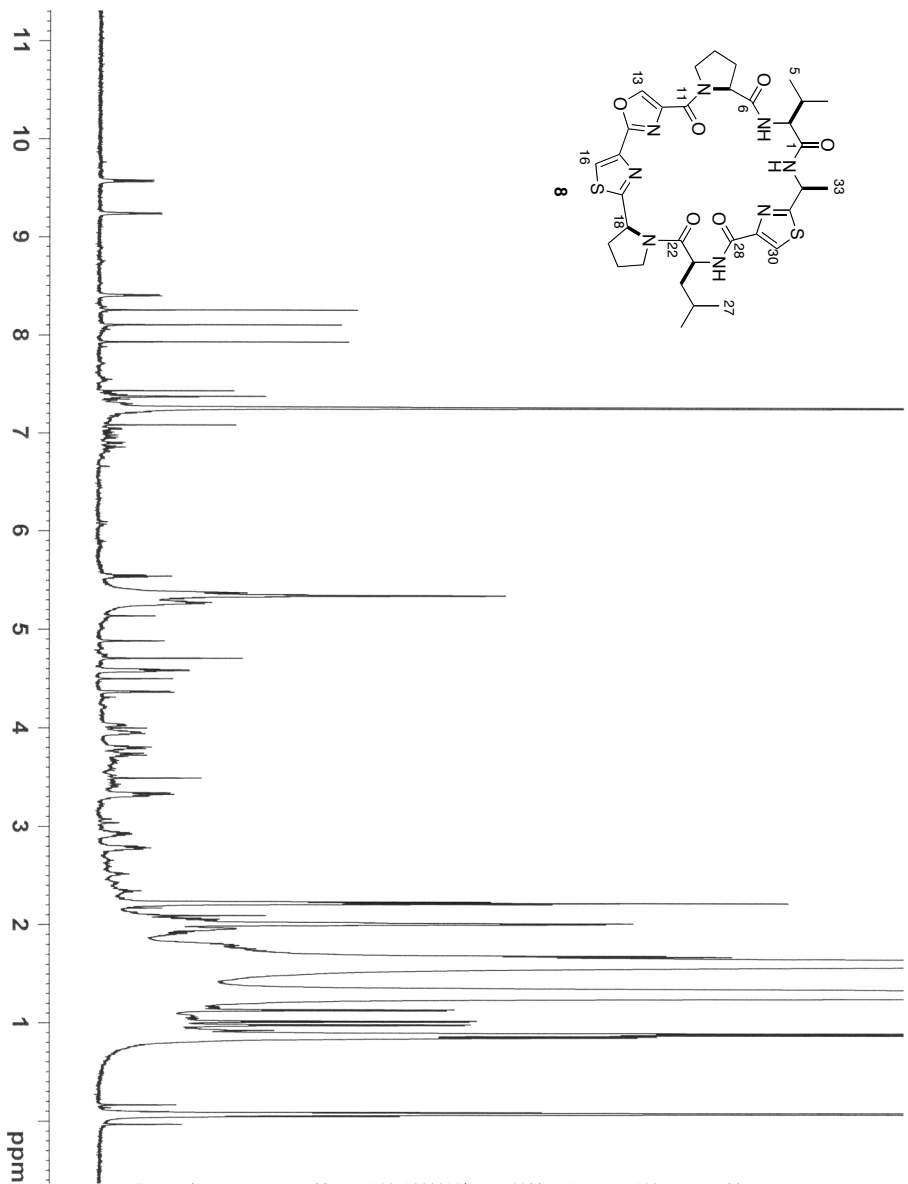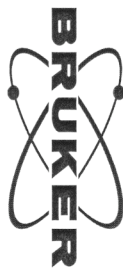

Current Data Parameters  
 NAME 5bfct3jucsd  
 EXPNO 2  
 PROCNO 1

F2 - Acquisition Parameters  
 Date\_ 20080626  
 Time\_ 19.04

INSTRUM spect  
 PROBD 1.7 mm CPTCL1  
 PULPROG zg30  
 TD 57690  
 SOLVENT CDCl3  
 NS 128  
 DS 2

SWH 9615.385 Hz  
 FIDRES 0.166673 Hz  
 AQ 2.9999299 sec  
 RG 1440  
 DW 52.000 usec  
 DE 6.50 usec  
 TE 303.0 K  
 D1 1.50000000 sec  
 TDO 1

==== CHANNEL f1 =====  
 NUC1 1H  
 P1 9.75 usec  
 PL1 15.00 dB  
 SFO1 599.8241987 MHz

F2 - Processing Parameters  
 SI 32768  
 SF 599.8200117 MHz  
 WDM EM  
 SSB 0  
 LB 0.10 Hz  
 GB 0  
 PC 1.00



COSY NMR spectrum of **8** (CDCl<sub>3</sub>, 600 MHz)

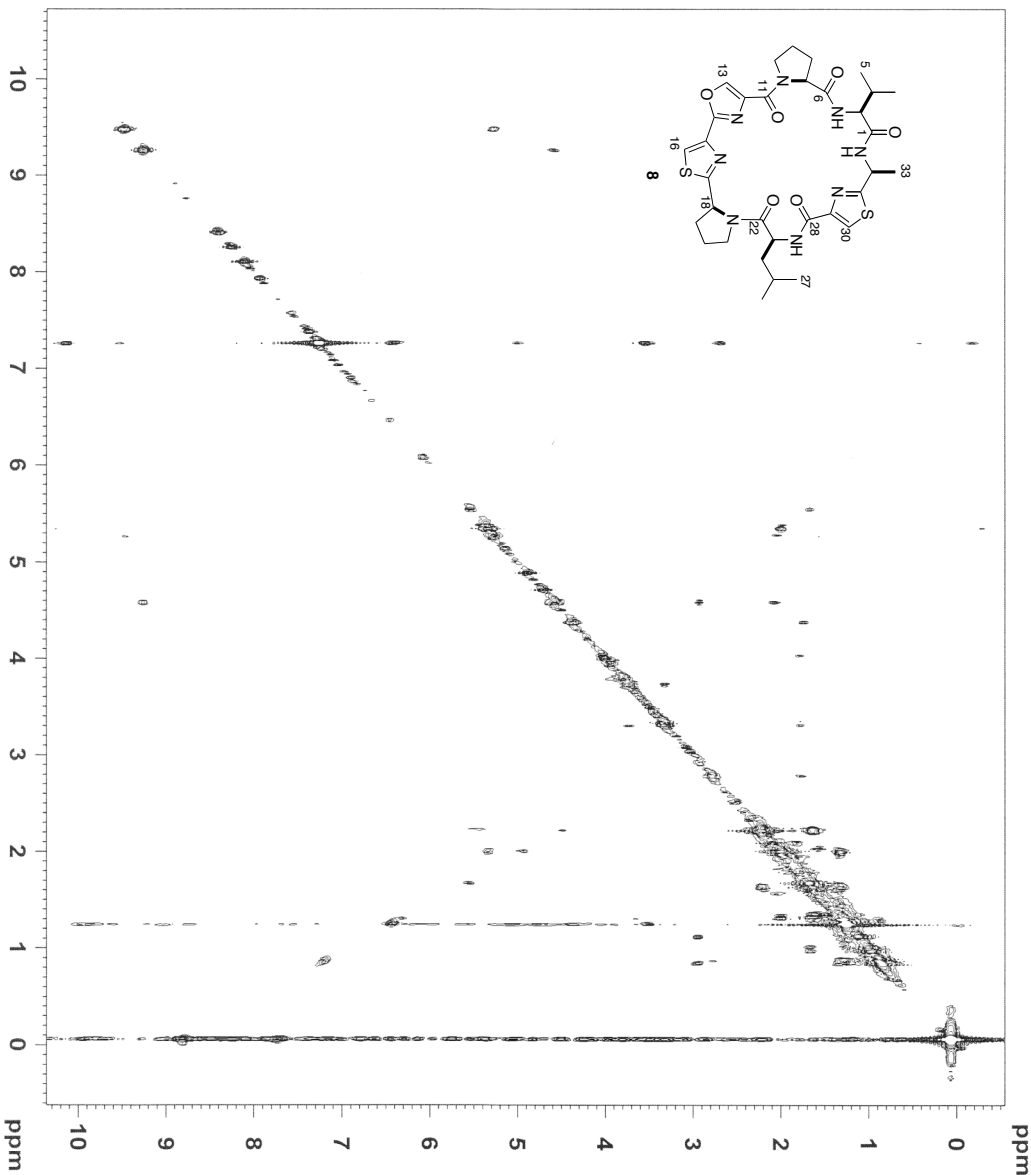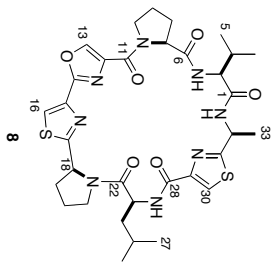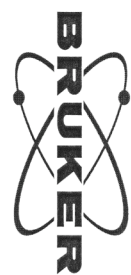

```

Current Data Parameters
NAME      BRFC13UCSP
EXPNO    24
PROCNO    1

F2 - Acquisition Parameters
Date_     20080629
Time      7.38
INSTRUM   spect
PROBHD    1.7 mm Cryo
PULPROG   cosympfepb
TD         2048
SOLVENT   CDCl3
NS        8
DS         8
SWH        7211.539 Hz
FIDRES     3.521259 Hz
AQ         0.1420181 sec
RG         512
DM         69.333 usec
DE         6.50 usec
dD         2.00 usec
dE         0.00005738 sec
dL1        1.48689198 sec
dL3        0.00000400 sec
dL6        0.00120000 sec
dL20       0.00120000 sec
IN0        0.00013895 sec
STICNT     128

===== CHANNEL f1 =====
NUC1       1H
P1         9.50 usec
P2         19.00 usec
PC         15.00 usec
SFO1       599.8239991 MHz

===== GRADIENT CHANNEL =====
GPNAM2     SINE.100
GPZ1       10.00 %
GPZ2       10.00 %
F16        1000.00 usec

F1 - Acquisition Parameters
IND0       1
NUC1       13C
P1         25.00 usec
P2         599.823 MHz
PC         15.00 usec
SFO1       599.8201000 MHz
SFO2       28.112631 Hz
SW         11.998 ppm
FMODE      States-TPPI

F2 - Processing parameters
SI         1024
SF         599.8201000 MHz
WDW        EM
SSB        0
LB         0.00 Hz
GB         0
PC         1.40

F1 - Processing parameters
SI         1024
SF         599.8201000 MHz
WDW        EM
SSB        0
LB         0.00 Hz
GB         0
PC         0
  
```

TOCSY NMR spectrum of 8 (CDCl<sub>3</sub>, 600 MHz)

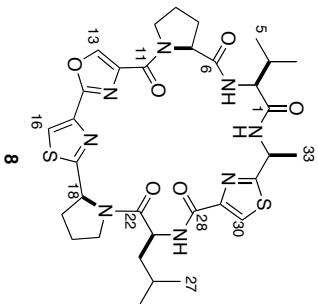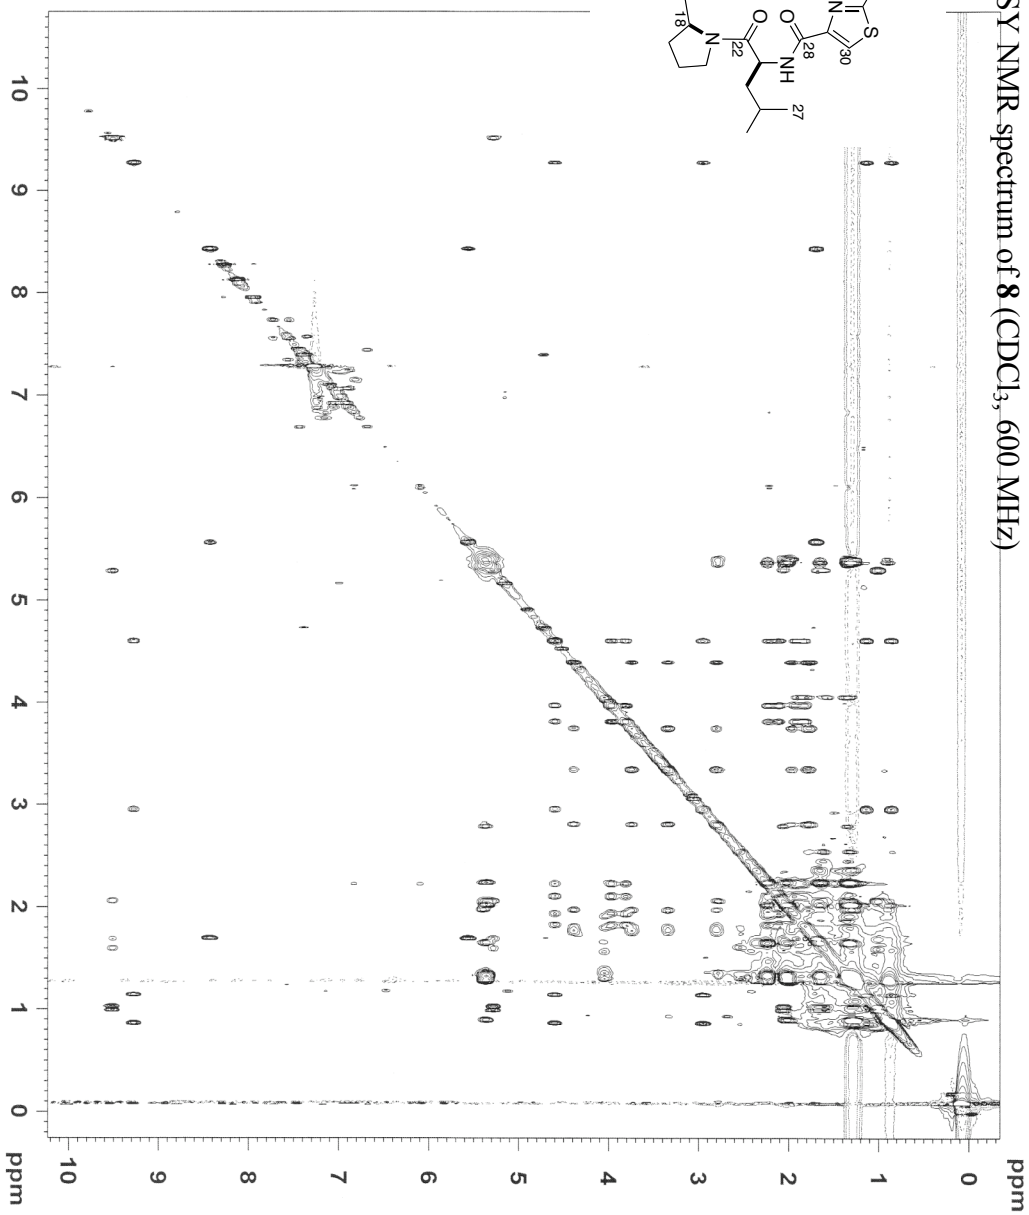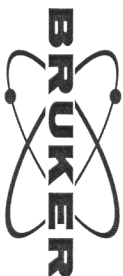

Current Data Parameters  
 NAME 5frc3jucsd  
 EXPNO 23  
 PROCNO 1

F2 - Acquisition Parameters  
 Date\_ 20080629  
 Time 3.28  
 INSTRUM 1.7 mm QNP5 spect  
 FIDPROC mlevph  
 TD 2048  
 SOLVENT CDCl3  
 NS 24  
 DS 2  
 SWH 7211.539 Hz  
 FIDRES 3.521259 Hz  
 AQ 0.1420447 sec  
 DE 69.333 usec  
 TE 295.10 K  
 D1 2.0000000 sec  
 D12 0.0002000 sec  
 D9 0.3000001 sec  
 FACTOR1 0.0001320  
 FWD 110  
 SCALES 180  
 STICNT 6  
 128

===== CHANNEL f1 =====  
 NUC1 1H  
 P1 9.50 usec  
 P17 2500.00 usec  
 P2 11.00 usec  
 P6 25.00 usec  
 P7 50.00 usec  
 FL1 15.00 dB  
 FL2 20.00 dB  
 SFO1 599.822991 MHz

F1 - Acquisition parameters  
 TD 25  
 SFO1 599.823 MHz  
 FIDRES 28.112631 Hz  
 SW 11.998 ppm  
 FWHODE States-1PFI

F2 - Processing parameters  
 SI 1024  
 SF 599.822991 MHz  
 SSB 2  
 LB 0.00 Hz  
 GB 0  
 EC 1.40

F1 - Processing parameters  
 SI 1024  
 SF 599.820000 MHz  
 SSB 2  
 WDW GSIINE  
 GB 0.00 Hz  
 CB 2



HMBC NMR spectrum of **8** (CDCl<sub>3</sub>, 600 MHz)

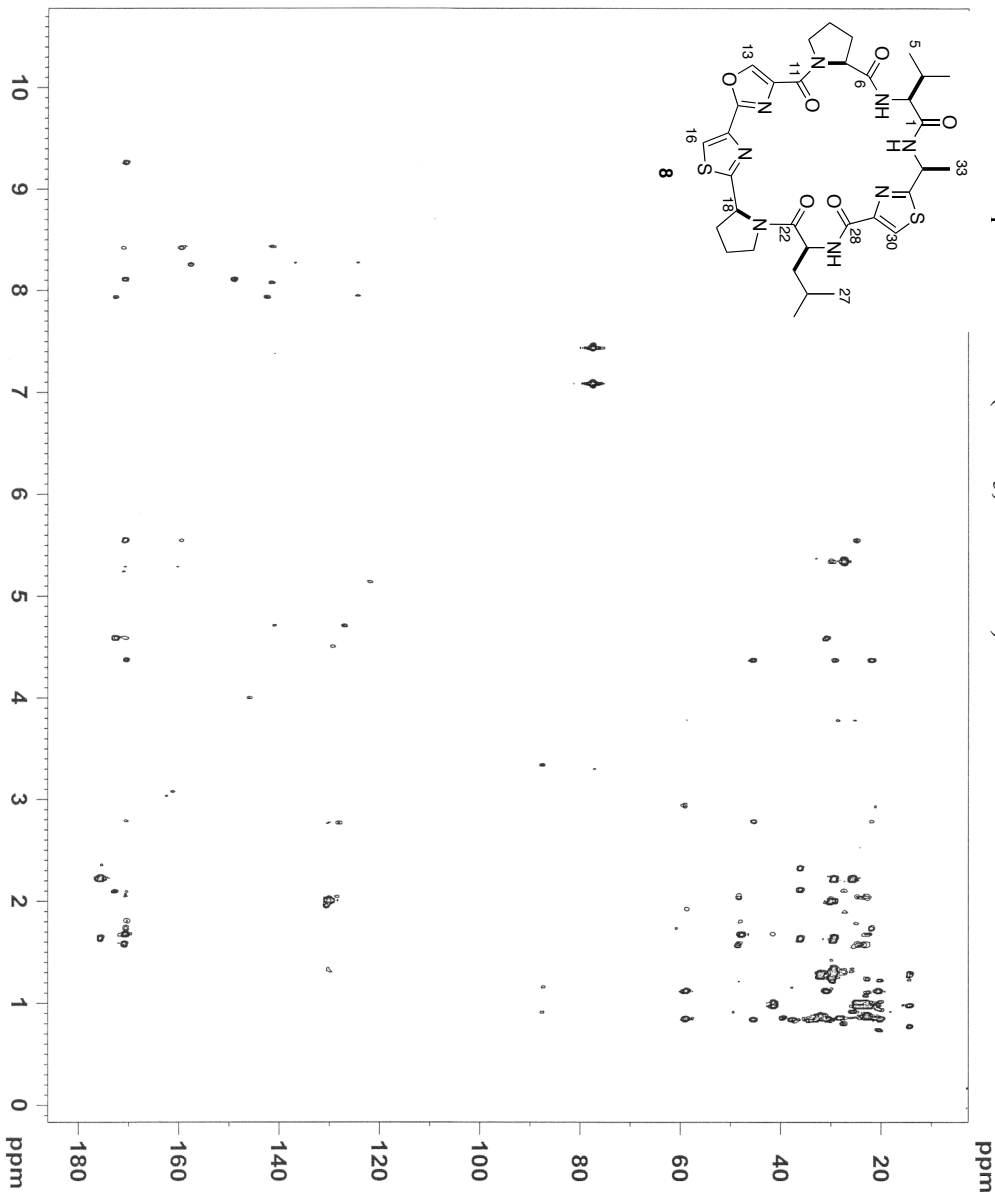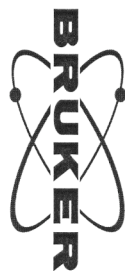

Current Data Parameters  
 NAME SPC12UCSD  
 EXPTNO 13  
 PROCNO 1

F2 - Acquisition Parameters  
 Date\_ 2009-02-12  
 Time 2.42  
 INSTRUM spect  
 PULPROG hmcpg1prdtf  
 TD 4096  
 NS 384  
 DSF 64  
 SFO2 150.8361700 MHz  
 AQ 0.2849393 sec  
 FIDRES 1.760630 Hz  
 EQ 62.333 usec  
 DE 6.50 usec  
 TE 300.2 K  
 C13ST13 145.0000000  
 CNST2 1.0000000 sec  
 D0 1.0000000 sec  
 D16 0.0020000 sec  
 G2 0.0034828 sec  
 G3 0.0001490 sec  
 INO 0.0001490 sec

\*\*\*\*\* CHANNEL f1 \*\*\*\*\*  
 NUC1 1H  
 P1 9.50 usec  
 PL1 0.00 dB  
 P12 15.00 dB  
 SFO1 599.822991 MHz

\*\*\*\*\* CHANNEL f2 \*\*\*\*\*  
 NUC2 13C  
 P2 12.10 usec  
 PL2 0.50 dB  
 SFO2 150.8361700 MHz

\*\*\*\*\* GRADIENT CHANNEL \*\*\*\*\*  
 GNUM1 SINE:100  
 GNUM2 SINE:100  
 GNUM3 SINE:100  
 GPZ1 56.00 %  
 GPZ2 48.10 %  
 GPZ3 48.10 %  
 P16 1000.00 usec

F1 - Acquisition parameters  
 NFO 562  
 SFO1 150.836 MHz  
 FIDRES 131.082214 Hz  
 SFO2 222.473 ppm  
 SFOXIDE QF

F2 - Processing parameters  
 SF 599.820074 MHz  
 SINE SINE  
 LA 0.00 Hz  
 GB 1.40  
 PC 0

F1 - Processing parameters  
 OF 150.8248258 MHz  
 SF 599.820074 MHz  
 SINE SINE  
 SSB 0.00 Hz  
 GB 0

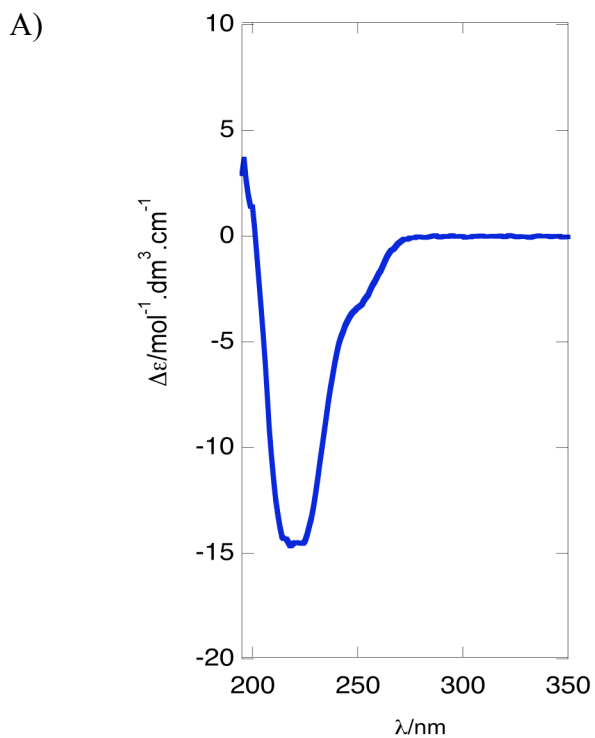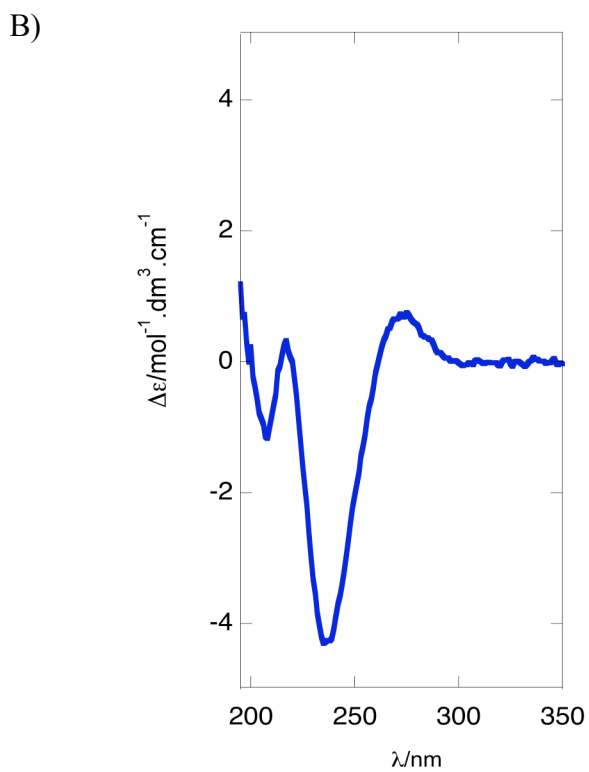

Circular Dichroism spectra of A) sanguinamide A ( $3.8 \times 10^{-4}$  M, MeOH) and B) sanguinamide B ( $2.1 \times 10^{-4}$  M, MeOH)
